# Supplementary material for: Distinct composition of the oral indigenous microbiota in South Korean and Japanese adults
Source: PubMed Central journal article supplement — Sci Rep. 2014 Nov 11;4:6990. doi: 10.1038/srep06990 (PMC4227031; doi:10.1038/srep06990), 2014-11-11
Supplement: srep06990-s1.pdf [file srep06990-s1.pdf]

# Distinct composition of the oral indigenous microbiota in South Korean and Japanese adults

Toru Takeshita<sup>1</sup>, Kazuki Matsuo<sup>1,2</sup>, Michiko Furuta<sup>1</sup>, Yukie Shibata<sup>1</sup>, Kaoru Fukami<sup>1</sup>, Yoshihiro Shimazaki<sup>3</sup>, Sumio Akifusa<sup>4</sup>, Dong-Hung Han<sup>5</sup>, Hyun-Duck Kim<sup>5</sup>, Takeshi Yokoyama<sup>2</sup>, Toshiharu Ninomiya<sup>6</sup>, Yutaka Kiyohara<sup>6</sup>, Yoshihisa Yamashita<sup>1\*</sup>

<sup>1</sup>Section of Preventive and Public Health Dentistry, Division of Oral Health, Growth and Development and <sup>2</sup>Section of Dental Anesthesiology, Division of Maxillofacial Diagnostic and Surgical Sciences, Kyushu University Faculty of Dental Science, Fukuoka, Japan, <sup>3</sup>Department of Preventive Dentistry and Dental Public Health, School of Dentistry, Aichi-Gakuin University, Nagoya, Japan, <sup>4</sup>Department of Health Management, School of Oral Health Sciences, Kyushu Dental College, Kitakyushu, Japan, <sup>5</sup>Department of Preventive and Social Dentistry, School of Dentistry, Seoul National University, Seoul, Korea, <sup>6</sup>Department of Environmental Medicine, Graduate School of Medical Sciences, Kyushu University, Fukuoka, Japan

Correspondence and requests for materials should be addressed to Y.Y.

Fig. S1

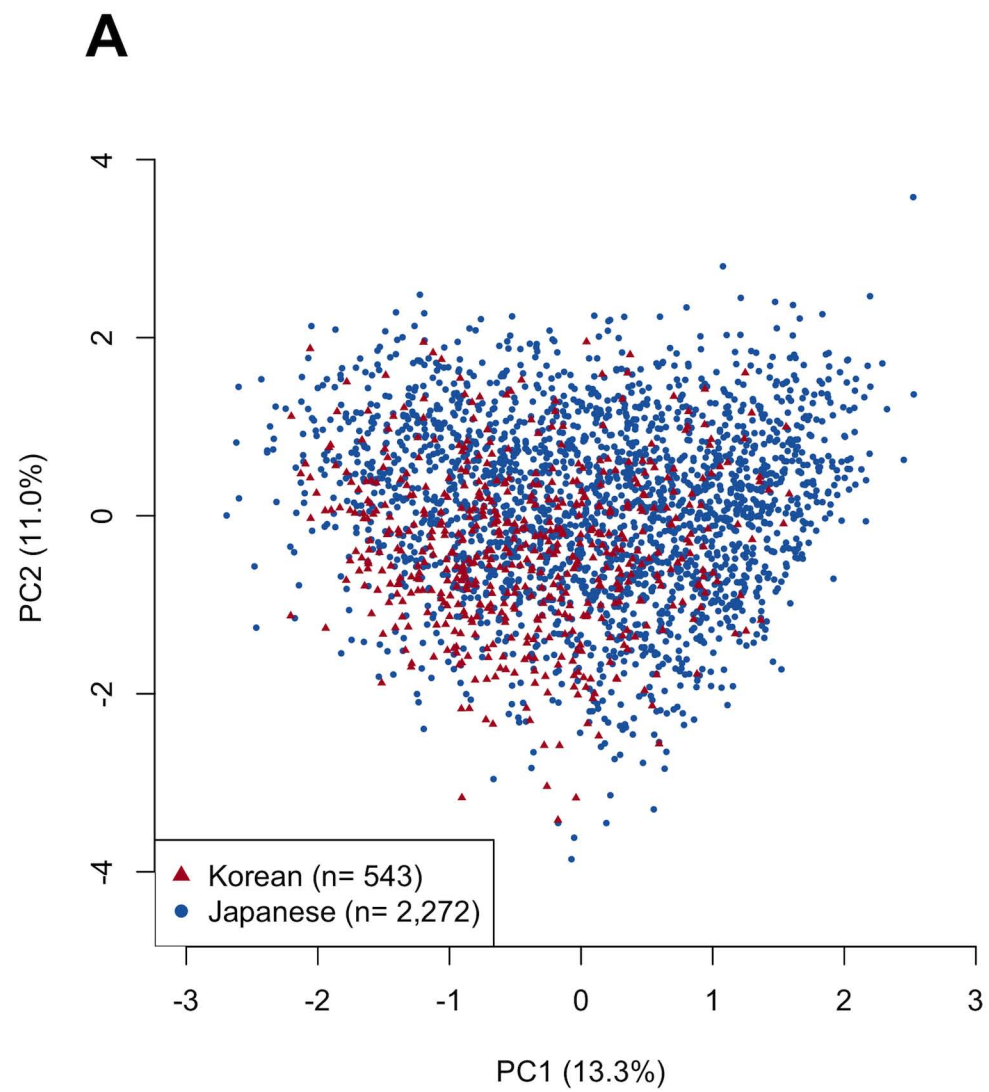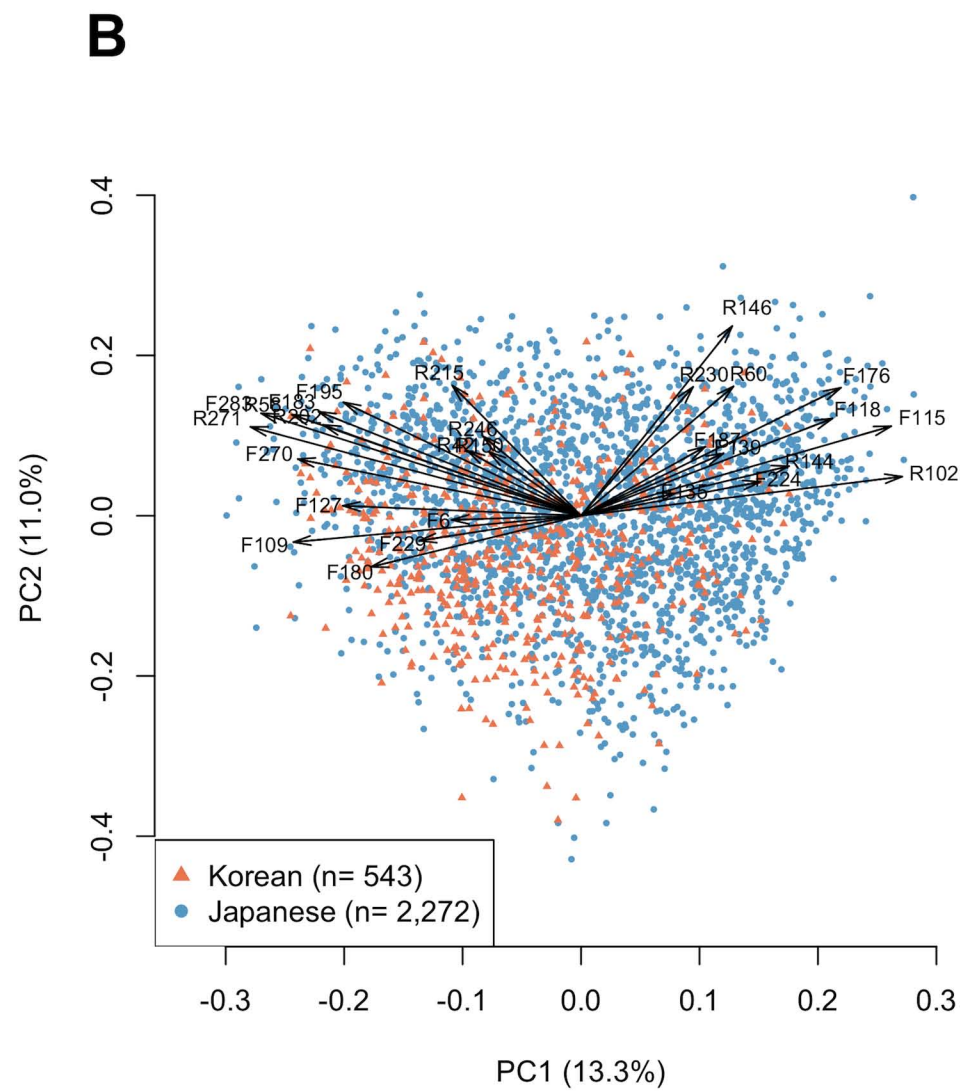

Fig. S2

**A**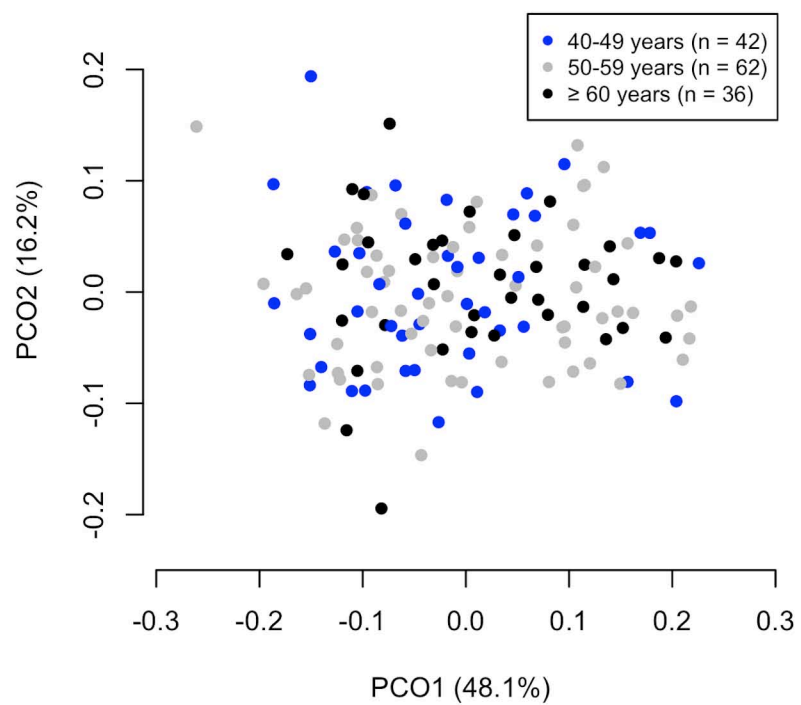**B**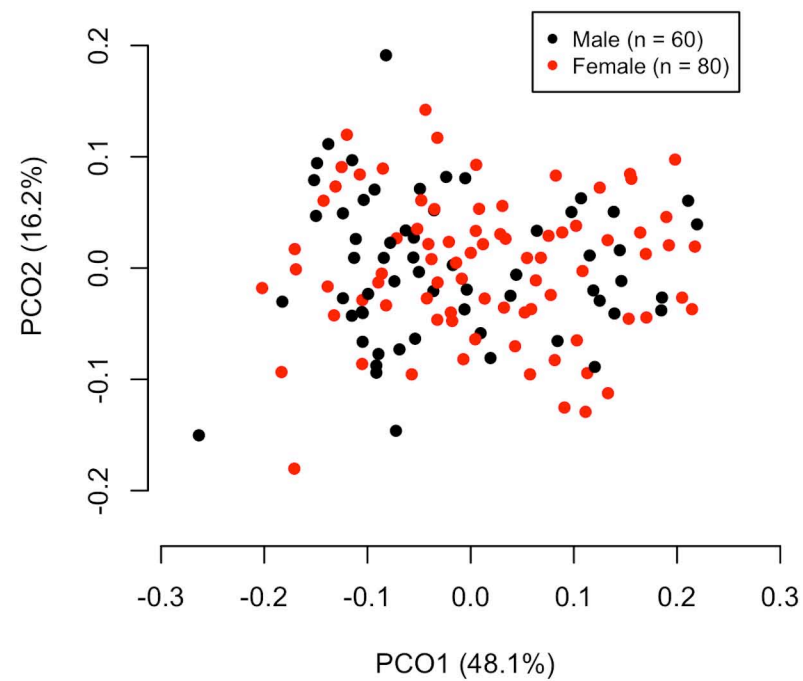**C**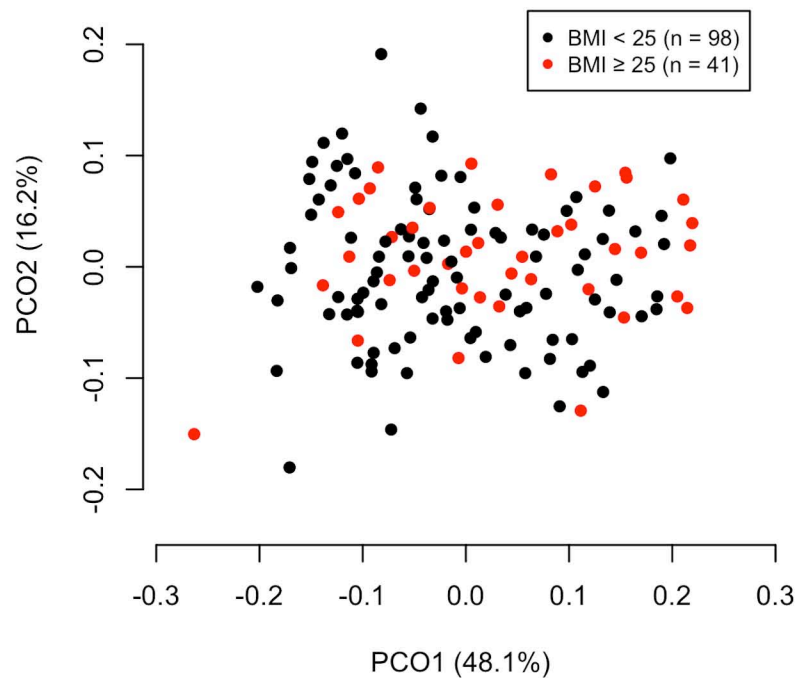**D**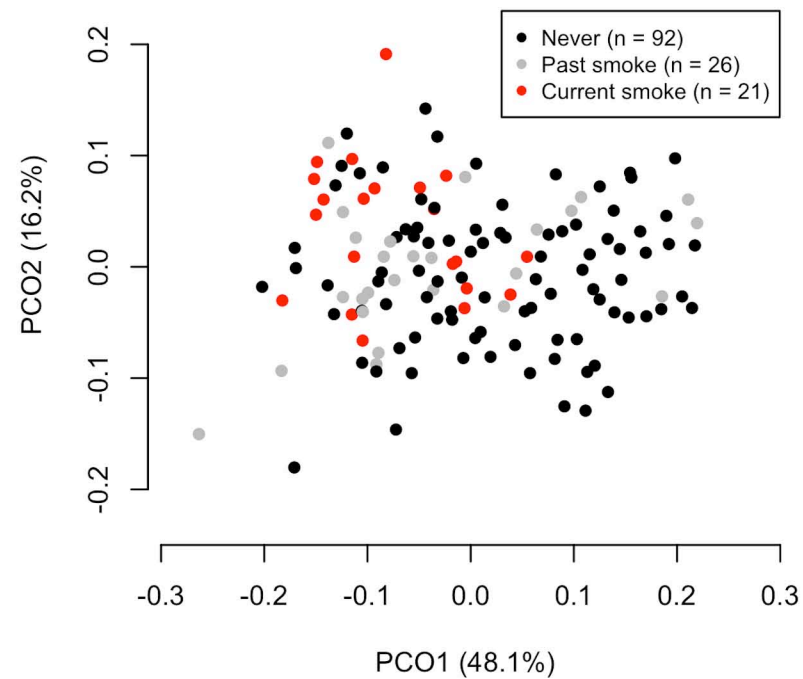

Fig. S3

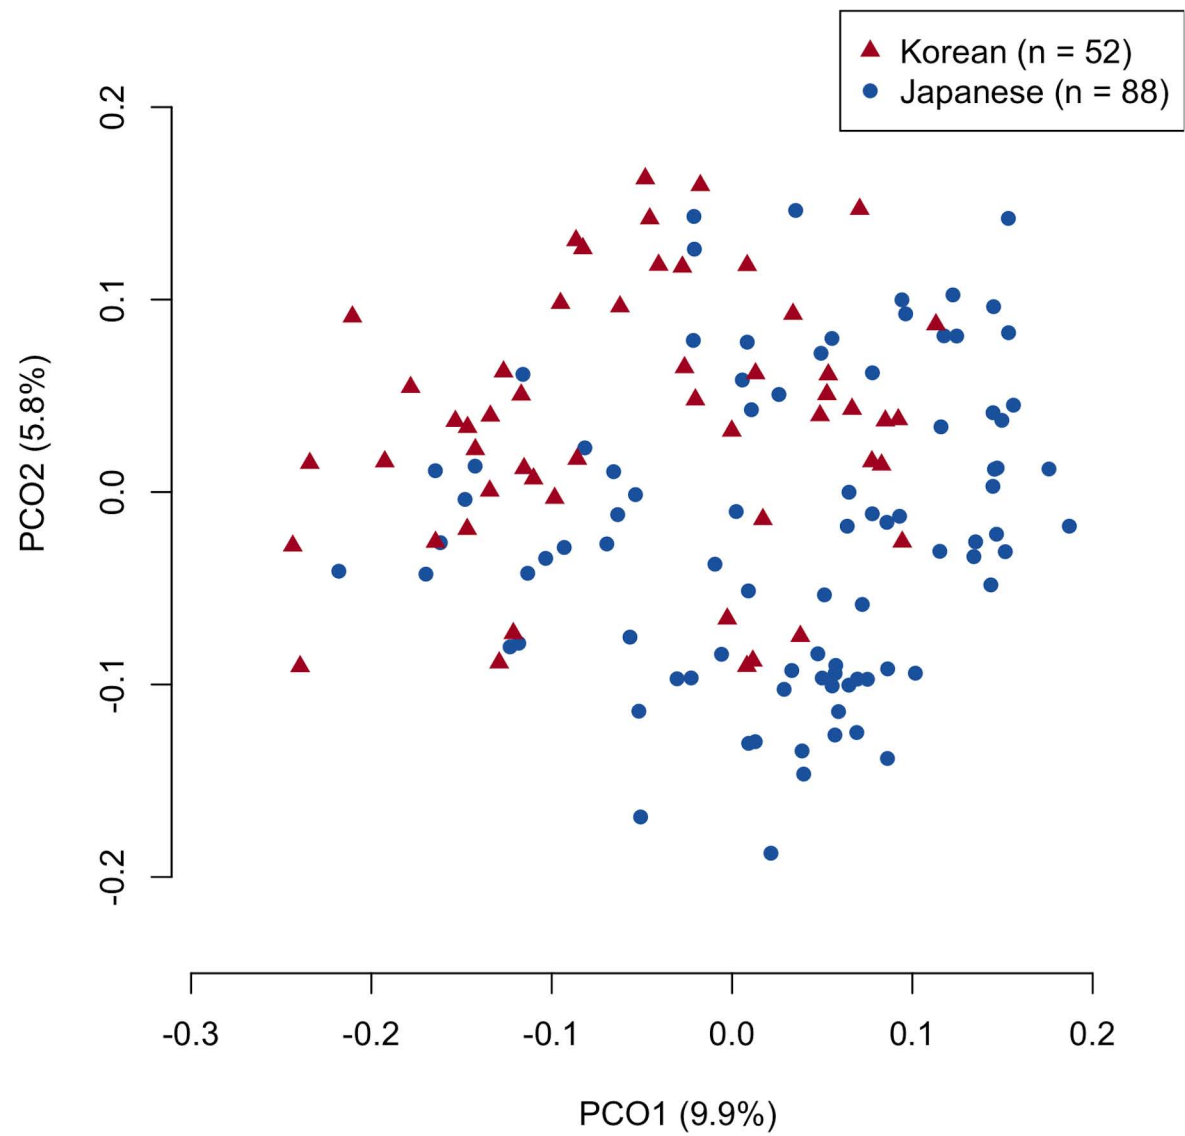

Japanese (n = 88)

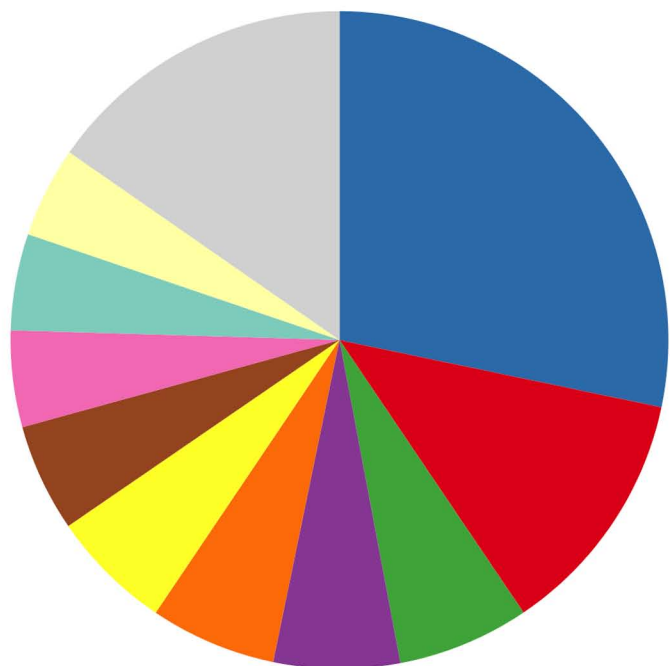

Korean (n = 52)

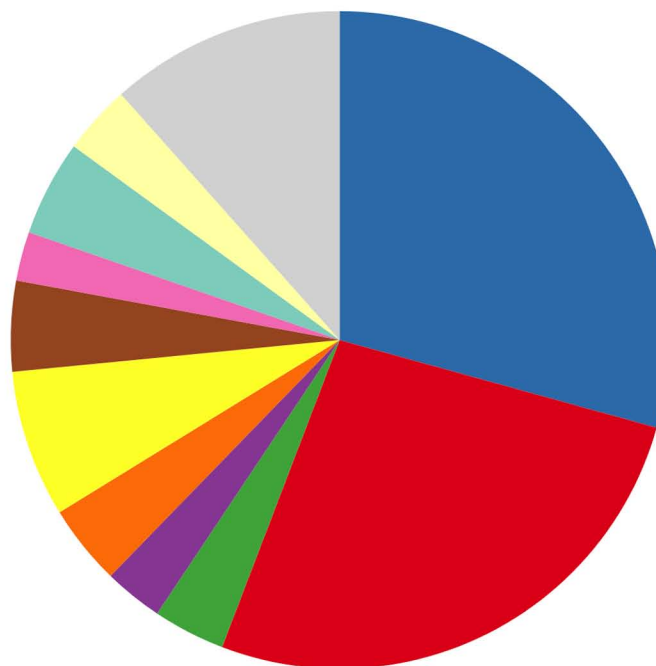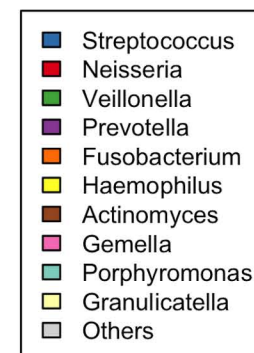

Fig. S5

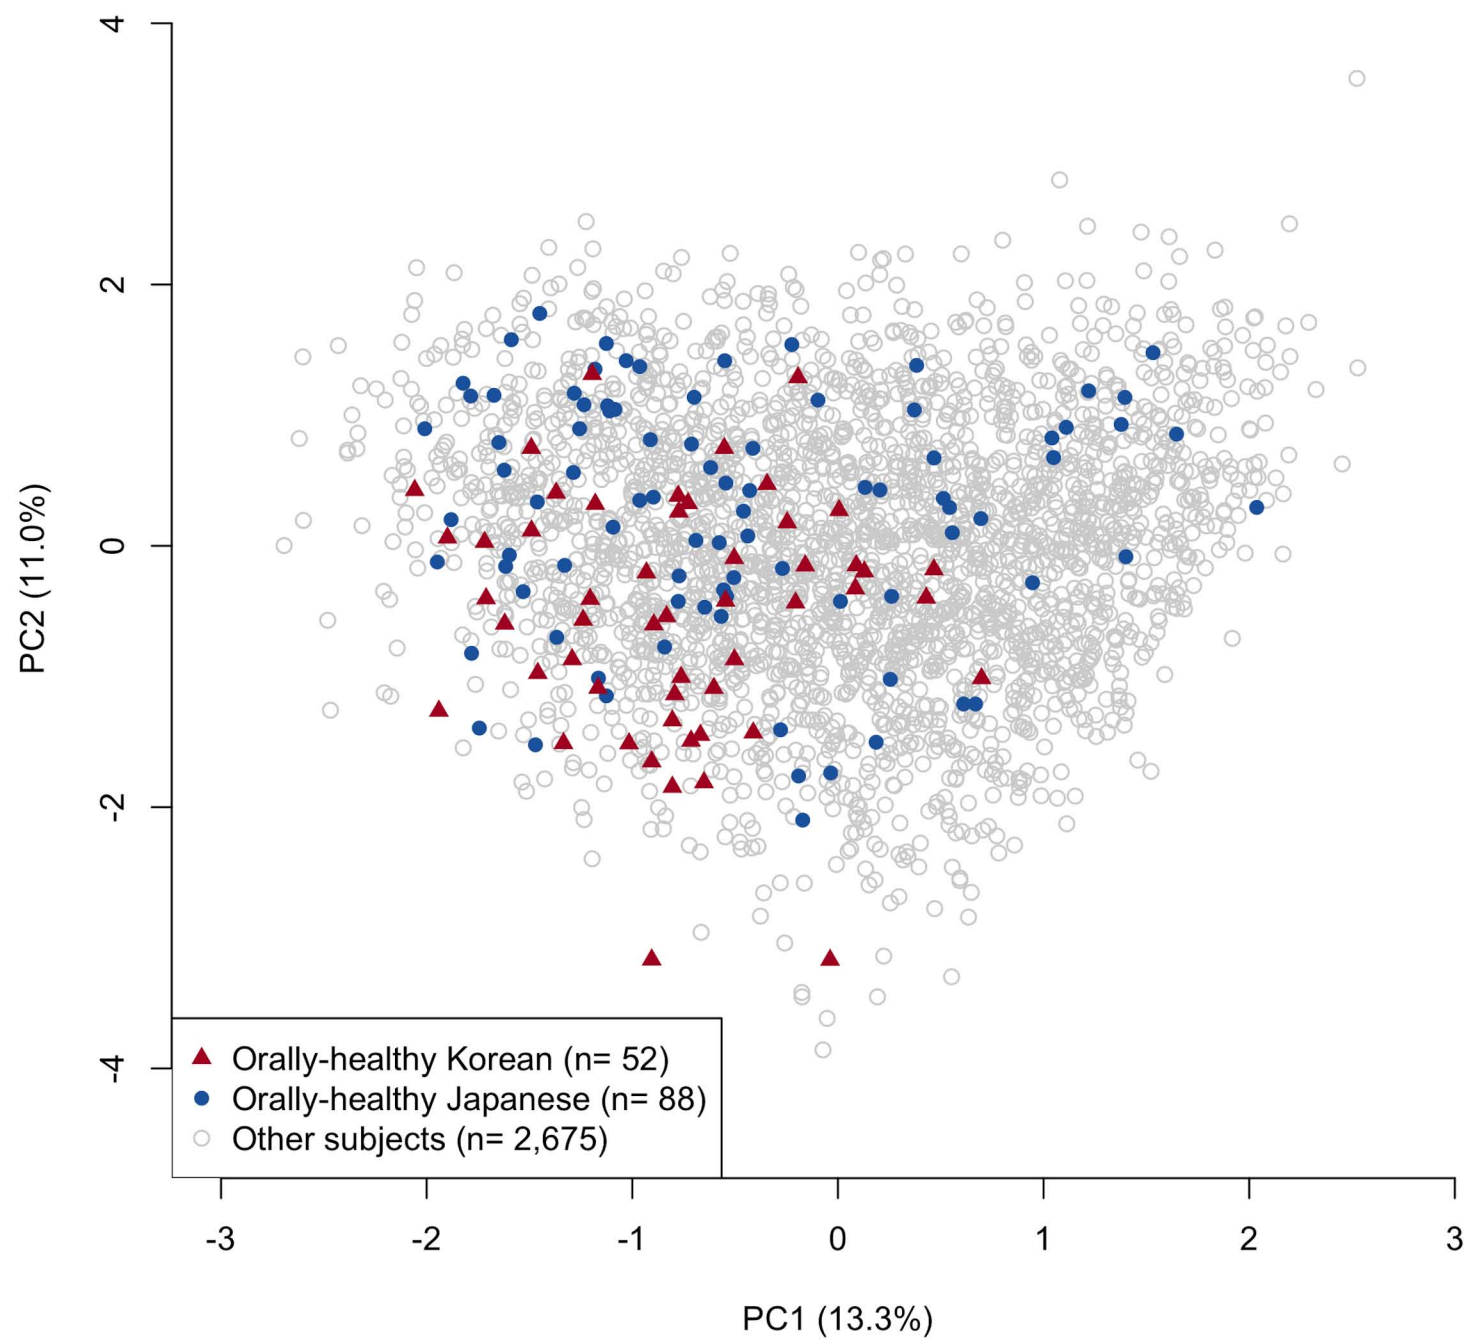

## Supplementary Figure Legend

**Figure S1** **A** Principal component analysis (PCA) diagram showing similarity relationships among 2,815 T-RFLP profiles. The T-RFLP profiles of subjects in the two countries are depicted using different colors and shapes. **B** Loading plot for the first two components based on 2,815 T-RFLP profiles. Only 28 TRFs with large factor loadings ( $> 0.2$  in absolute value) on the first principal component were selected, and these are indicated by arrows.

**Figure S2** Principal coordinate analysis (PCoA) plot showing similarity relationships among bacterial community samples from 140 orally healthy individuals (52 South Koreans and 88 Japanese) using the weighted UniFrac distance metric. The two components explained 48.1 and 16.2% of the variance, respectively. **A** Samples are depicted using different colors and shapes according to their age. **B** Samples are depicted using different colors and shapes according to their gender. **C** Samples are depicted using different colors and shapes according to body mass index ( $\text{BMI} \geq 25$ , obesity group;  $< 25$ , normal group). One Korean subject had no data about BMI. **D** Samples are depicted using different colors and shapes according to smoking experience. One Korean individual had no data about smoking status.

**Figure S3** Principal coordinate analysis (PCoA) plot showing similarity relationships among bacterial community samples from 140 orally healthy individuals (52 South Koreans and 88 Japanese) using the unweighted UniFrac distance metric. The two components explained 9.9 and 5.8% of the variance, respectively.

**Figure S4** Mean genera abundances in the salivary microbiota of orally healthy individuals in Japan and South Korea.

**Figure S5** Principal component analysis (PCA) diagram showing similarity relationships among 2,815 T-RFLP profiles also described in Figure S1. The T-RFLP profiles of orally healthy individuals in each cohort, who involved in pyrosequencing analysis are depicted using different colors and shapes. These orally healthy individuals were localized in the negative direction of PC1 on a PCA diagram that included all individuals, suggesting that their microbiomes comprised higher proportions of *Neisseria* and *Haemophilus* and lower proportions of *Prevotella* and *Veillonella* compared to subjects that had oral health problems. The peak area proportions of terminal restriction fragments corresponding to *Neisseria* and *Haemophilus*, *Prevotella* or *Veillonella* were described in Table S5.



## Supplemental Tables

Table S1. General and oral health conditions of each study population. [n (%)]

|                                              | Hisayama<br>(n = 2,272) | Yangpyeong<br>(n = 543) |
|----------------------------------------------|-------------------------|-------------------------|
| Age*                                         | 59.9 ± 10.3             | 61.1 ± 8.9              |
| Male                                         | 1011 (44.5)             | 198 (36.5)              |
| Dental condition                             |                         |                         |
| Number of present teeth*                     | 22.6 ± 7.5              | 24.4 ± 6.2              |
| ≥ 24                                         | 1405 (61.8)             | 378 (69.6)              |
| < 24                                         | 867 (38.2)              | 165 (30.4)              |
| Denture use                                  | 626 (27.6)              | 91 (16.8)               |
| Number of decayed, missing and filled teeth* | 19.3 ± 6.6              | 10.3 ± 7.2              |
| ≤ 10                                         | 252 (11.1)              | 322 (59.3)              |
| > 10                                         | 2020 (88.9)             | 221 (40.7)              |
| Number of decayed teeth*                     | 0.7 ± 1.6               | 1.7 ± 2.2               |
| No teeth                                     | 1598 (70.3)             | 232 (42.7)              |
| ≥ 1 teeth                                    | 674 (29.7)              | 311 (57.3)              |
| Periodontal condition                        |                         |                         |
| % teeth with PD of ≥ 4mm*†                   | 10.7 ± 19.4             | 3.6 ± 10.9              |
| No teeth                                     | 1341 (61.2)             | 442 (82.0)              |
| ≥ 1 teeth                                    | 851 (38.8)              | 97 (18.0)               |
| % teeth with CAL of ≥ 5mm*†                  | 9.7 ± 18.9              | 4.7 ± 11.6              |
| No teeth                                     | 1441 (65.7)             | 402 (74.6)              |
| ≥ 1 teeth                                    | 751 (34.3)              | 137 (25.4)              |
| % sites of BOP*†                             | 19.8 ± 23.3             | 18.8 ± 23.2             |
| ≤ 20                                         | 1433 (65.4)             | 368 (68.3)              |
| > 20                                         | 759 (34.6)              | 171 (31.7)              |

\* Mean ± SD.

† Edentulous individuals were excluded; Hisayama (n = 2,192), Yanpyeong (n = 539).

PD, pocket depth; CAL, clinical attachment loss; BOP, bleeding on probing.

Table S2. Bacterial candidates corresponding to the TRF combinations.

| TRF combination          | Genus                         | Species (Oral Taxon ID)                                                                                                                                                                                                                                                                                           |
|--------------------------|-------------------------------|-------------------------------------------------------------------------------------------------------------------------------------------------------------------------------------------------------------------------------------------------------------------------------------------------------------------|
| Negative loading for PC1 |                               |                                                                                                                                                                                                                                                                                                                   |
| F6–R58                   | <i>Flavobacteriales</i> [G-1] | 2 oral taxon (318, 321)                                                                                                                                                                                                                                                                                           |
| F6–R150                  | <i>Stenotrophomonas</i>       | <i>S. maltophilia</i> (663)                                                                                                                                                                                                                                                                                       |
| F6–R215                  | <i>Bergeyella</i>             | 2 oral taxon (322, 900)                                                                                                                                                                                                                                                                                           |
|                          | <i>Bacteroidetes</i> [G-3]    | 1 oral taxon (365)                                                                                                                                                                                                                                                                                                |
| F6–R246                  | <i>Bergeyella</i>             | 1 oral taxon (319)                                                                                                                                                                                                                                                                                                |
| F109–R150                | <i>Neisseria</i>              | <i>N. oralis</i> (14), <i>N. weaveri</i> (92), <i>N. subflava</i> (476), <i>N. elongata</i> (598), <i>N. flava</i> (609), <i>N. flavescens</i> (610), <i>N. lactamica</i> (649), <i>N. meningitidis</i> (669), <i>N. mucosa</i> (682), <i>N. pharyngis</i> (729), <i>N. sicca</i> (764) and 2 oral taxon (15, 16) |
|                          | <i>Haemophilus</i>            | <i>H. aegyptius</i> (535), <i>H. ducreyi</i> (821), <i>H. influenzae</i> (641), <i>H. parainfluenzae</i> (718), <i>H. haemolyticus</i> (851) and 2 oral taxon (35, 36, 908)                                                                                                                                       |
|                          | <i>Aggregatibacter</i>        | <i>A. actinomycetemcominans</i> (531), <i>A. aphrophilus</i> (545), <i>A. paraphrophilus</i> (720), <i>A. segnis</i> (762) and 3 oral taxon (458, 512 513, 898)                                                                                                                                                   |
|                          | <i>Eikenella</i>              | 1 oral taxon (11)                                                                                                                                                                                                                                                                                                 |
|                          | <i>Ralstonia</i>              | <i>R. pickettii</i> (854) and 1 oral taxon (406)                                                                                                                                                                                                                                                                  |
| F127–R150                | <i>Neisseria</i>              | <i>N. bacilliformis</i> (13), <i>N. polysaccharea</i> (737) and one oral taxon (20)                                                                                                                                                                                                                               |
|                          | <i>Eikenella</i>              | <i>E. corrodens</i> (577)                                                                                                                                                                                                                                                                                         |
|                          | <i>Kingella</i>               | <i>K. oralis</i> (706)                                                                                                                                                                                                                                                                                            |
|                          | <i>Simonsiella</i>            | <i>S. muelleri</i> (683)                                                                                                                                                                                                                                                                                          |

|           |                      |                                                        |
|-----------|----------------------|--------------------------------------------------------|
| F127–R215 | <i>Paenibacillus</i> | 1 oral taxon (48)                                      |
| F183–R58  | <i>Parvimonas</i>    | <i>P. micra</i> (111) and 2 oral taxon (110, 393)      |
| F183–R215 | <i>Streptococcus</i> | <i>S. anginosus</i> (543)                              |
|           | <i>Parvimonas</i>    | <i>P. micra</i> (111)                                  |
| F195–R150 | <i>Treponema</i>     | 2 oral taxon (251, 256)                                |
| F229–R150 | <i>Treponema</i>     | 1 oral taxon (254)                                     |
| F270–R58  | <i>Porphyromonas</i> | <i>P. catoniae</i> (283) and 2 oral taxon (279, 284)   |
| F283–R271 | <i>Porphyromonas</i> | <i>P. gingivalis</i> (619) and 2 oral taxon (285, 395) |

Positive loading for PC1

|           |                        |                                                                                                                                                                                                                                                                                                                                                                        |
|-----------|------------------------|------------------------------------------------------------------------------------------------------------------------------------------------------------------------------------------------------------------------------------------------------------------------------------------------------------------------------------------------------------------------|
| F115–R102 | <i>Veillonella</i>     | <i>V. dispar</i> (160), <i>V. parvula</i> (161) and <i>V. denticariosi</i> (887)                                                                                                                                                                                                                                                                                       |
| F115–R230 | <i>Mitsuokella</i>     | <i>M. multacida</i> (684)                                                                                                                                                                                                                                                                                                                                              |
| F118–R60  | <i>Prevotella</i>      | <i>P. baroniae</i> (553)                                                                                                                                                                                                                                                                                                                                               |
| F118–R102 | <i>Dialister</i>       | <i>D. micraerophilus</i> (843)                                                                                                                                                                                                                                                                                                                                         |
|           | <i>Anaeroglobus</i>    | <i>A. geminatus</i> (121)                                                                                                                                                                                                                                                                                                                                              |
| F118–R230 | <i>Dialister</i>       | <i>D. pneumonisintes</i> (736) and 1 oral taxon (502)                                                                                                                                                                                                                                                                                                                  |
| F135–R144 | <i>Corynebacterium</i> | <i>C. durum</i> (595)                                                                                                                                                                                                                                                                                                                                                  |
| F176–R60  | <i>Prevotella</i>      | <i>P. oulorum</i> (288), <i>P. maculosa</i> (289), <i>P. denticola</i> (291), <i>P. salivae</i> (307),<br><i>P. melaninogenica</i> (469), <i>P. bivia</i> (562), <i>P. dentalis</i> (583), <i>P. loescheii</i> (658),<br><i>P. fusca</i> (782), <i>P. shahii</i> (795), <i>P. scopos</i> (885)<br>and 10 oral taxon (293, 306, 309, 313, 314, 317, 396, 443, 472, 820) |
| F176–R146 | <i>Prevotella</i>      | <i>P. histicola</i> (298) and <i>P. melaninogenica</i> (469)                                                                                                                                                                                                                                                                                                           |

|           |                       |                                                                      |
|-----------|-----------------------|----------------------------------------------------------------------|
|           | <i>Alloprevotella</i> | <i>A. rava</i> (302) and 6 oral taxon (308, 473, 474, 912, 913, 914) |
| F176–R230 | <i>Alloiococcus</i>   | <i>A. otitis</i> (831)                                               |
| F187–R230 | <i>Lactobacillus</i>  | <i>L. salivarius</i> (756)                                           |

---

Bacterial candidates were selected from 831 oral bacterial 16S rRNA gene sequences (HOMD 16S rRNA RefSeq Version 13.2) deposited in deposited in the Human Oral Microbiome Database<sup>1</sup>.

## Reference

1. Chen T, Yu WH, Izard J, Baranova OV, Lakshmanan A, Dewhirst FE. The Human Oral Microbiome Database: a web accessible resource for investigating oral microbe taxonomic and genomic information. Database (Oxford), baq013 (2010).

Table S3. Summary of pyrosequencing analysis.

| Sample name                   | Tag sequence | Number of reads | Number of high quality reads |
|-------------------------------|--------------|-----------------|------------------------------|
| Japanese individuals (n = 88) |              |                 |                              |
| HS001                         | AGACGCACTC   | 7,385           | 3,670                        |
| HS002                         | AGCACTGTAG   | 5,715           | 2,963                        |
| HS003                         | TCTCTATGCG   | 7,363           | 3,907                        |
| HS004                         | TGATACGTCT   | 6,938           | 3,408                        |
| HS005                         | ATAGAGTACT   | 7,233           | 3,598                        |
| HS006                         | CGACGTGACT   | 9,177           | 4,719                        |
| HS007                         | TACACGTGAT   | 7,167           | 3,826                        |
| HS008                         | TGACGTATGT   | 7,540           | 3,821                        |
| HS009                         | TGTGAGTAGT   | 7,389           | 3,411                        |
| HS010                         | ACTCGCGCAC   | 8,101           | 4,377                        |
| HS011                         | ATCTACTGAC   | 8,679           | 4,226                        |
| HS012                         | CGAGACGCGC   | 9,607           | 5,268                        |
| HS013                         | CTCTACGCTC   | 6,882           | 3,447                        |
| HS014                         | TCACTCATAAC  | 6,479           | 3,155                        |
| HS015                         | TCATCGAGTC   | 8,367           | 4,428                        |
| HS016                         | TGAGTGACGC   | 7,174           | 3,355                        |
| HS017                         | ATGTACGATG   | 4,884           | 2,553                        |
| HS018                         | CACTCGCACG   | 6,357           | 3,276                        |
| HS019                         | CTCGCACGCG   | 8,349           | 4,140                        |
| HS020                         | CTGTGCGTCG   | 5,868           | 2,789                        |
| HS021                         | TATACATGTG   | 5,483           | 2,555                        |
| HS022                         | TCTGATCGAG   | 4,684           | 2,394                        |
| HS023                         | ACGAGTGCGT   | 8,244           | 3,270                        |
| HS024                         | ATATCGCGAG   | 8,611           | 3,197                        |
| HS025                         | CTCGCGTGTC   | 8,687           | 3,459                        |
| HS026                         | TCGTCGCTCG   | 7,701           | 3,193                        |
| HS027                         | ACGCGAGTAT   | 9,253           | 3,557                        |
| HS028                         | ACACATACGC   | 8,909           | 3,569                        |
| HS029                         | AGTGTATGTC   | 7,949           | 2,859                        |
| HS030                         | CATACTCTAC   | 8,320           | 3,077                        |

|       |             |       |       |
|-------|-------------|-------|-------|
| HS031 | CGAGACGCGC  | 8,777 | 3,267 |
| HS032 | CGTCGATCTC  | 8,553 | 3,540 |
| HS033 | CTCTACGCTC  | 8,119 | 3,218 |
| HS034 | TAGACTGCAC  | 7,905 | 3,190 |
| HS035 | ATGTGTCTAG  | 4,781 | 1,896 |
| HS036 | CGATCTGTCTG | 6,456 | 2,548 |
| HS037 | CTATGTACAG  | 7,706 | 2,966 |
| HS038 | ACGAGTGCCT  | 8,718 | 3,401 |
| HS039 | AGACGCACTC  | 8,807 | 2,969 |
| HS040 | AGCACTGTAG  | 8,649 | 3,169 |
| HS041 | ATCAGACACG  | 5,947 | 2,318 |
| HS042 | ATATCGCGAG  | 6,943 | 2,801 |
| HS043 | CTCGCGTGTC  | 9,127 | 3,153 |
| HS044 | TCTCTATGCG  | 8,464 | 3,636 |
| HS045 | TGATACGTCT  | 6,800 | 2,549 |
| HS046 | CATAGTAGTG  | 8,852 | 3,331 |
| HS047 | CGAGAGATAC  | 9,533 | 4,184 |
| HS048 | CGTCTAGTAC  | 9,556 | 3,898 |
| HS049 | TCTACGTAGC  | 7,023 | 2,856 |
| HS050 | TGTACTACTC  | 6,925 | 2,661 |
| HS051 | ACGACTACAG  | 8,573 | 3,269 |
| HS052 | CGTAGACTAG  | 8,757 | 3,150 |
| HS053 | TACTCTCGTG  | 7,490 | 2,451 |
| HS054 | TAGAGACGAG  | 6,817 | 2,622 |
| HS055 | TCGTCGCTCG  | 6,285 | 2,566 |
| HS056 | ACATACGCGT  | 7,334 | 2,967 |
| HS057 | ACGCGAGTAT  | 7,657 | 3,124 |
| HS058 | ACTACTATGT  | 8,078 | 3,169 |
| HS059 | ACTGTACAGT  | 8,618 | 3,208 |
| HS060 | AGACTATACT  | 8,178 | 3,071 |
| HS061 | AGCGTCGTCT  | 6,453 | 2,615 |
| HS062 | AGTACGCTAT  | 7,725 | 2,804 |
| HS063 | ATAGAGTACT  | 6,522 | 2,559 |
| HS064 | CACGCTACGT  | 7,771 | 3,077 |
| HS065 | CAGTAGACGT  | 7,450 | 2,710 |

|                                   |            |       |       |
|-----------------------------------|------------|-------|-------|
| HS066                             | CGACGTGACT | 5,823 | 2,205 |
| HS067                             | TACACACACT | 6,815 | 2,783 |
| HS068                             | TACACGTGAT | 6,213 | 2,362 |
| HS069                             | TACAGATCGT | 5,950 | 2,341 |
| HS070                             | TACGCTGTCT | 7,163 | 3,174 |
| HS071                             | TAGTGTAGAT | 5,749 | 2,226 |
| HS072                             | TCGATCACGT | 7,397 | 2,865 |
| HS073                             | TCGCACTAGT | 7,859 | 3,224 |
| HS074                             | TCTAGCGACT | 7,668 | 2,772 |
| HS075                             | TCTATACTAT | 7,767 | 3,241 |
| HS076                             | TGACGTATGT | 7,491 | 2,697 |
| HS077                             | TGTGAGTAGT | 5,937 | 2,270 |
| HS078                             | ACACATACGC | 6,974 | 3,130 |
| HS079                             | ACAGTCGTGC | 6,523 | 2,733 |
| HS080                             | ACATGACGAC | 7,553 | 2,840 |
| HS081                             | ACGACAGCTC | 6,358 | 2,372 |
| HS082                             | ACGTCTCATC | 7,148 | 2,987 |
| HS083                             | ACTCATCTAC | 8,192 | 3,165 |
| HS084                             | ACTCGCGCAC | 7,618 | 3,003 |
| HS085                             | AGAGCGTCAC | 6,964 | 2,918 |
| HS086                             | AGCGACTAGC | 7,149 | 2,906 |
| HS087                             | AGTAGTGATC | 6,072 | 2,484 |
| HS088                             | AGTGACACAC | 5,779 | 2,634 |
| South Korean individuals (n = 52) |            |       |       |
| YP001                             | AGTGTATGTC | 6,313 | 2,801 |
| YP002                             | ATAGATAGAC | 6,066 | 2,687 |
| YP003                             | ATATAGTCGC | 6,043 | 2,531 |
| YP004                             | ATCTACTGAC | 7,958 | 3,208 |
| YP005                             | CACGTAGATC | 7,659 | 3,235 |
| YP006                             | CACGTGTCGC | 6,713 | 2,849 |
| YP007                             | CATACTCTAC | 8,124 | 3,682 |
| YP008                             | CGACACTATC | 7,426 | 3,061 |
| YP009                             | CGAGACGCGC | 7,220 | 3,127 |
| YP010                             | CGTATGCGAC | 7,162 | 2,977 |
| YP011                             | CGTCGATCTC | 8,338 | 3,388 |

|       |             |       |       |
|-------|-------------|-------|-------|
| YP012 | CTACGACTGC  | 8,532 | 3,225 |
| YP013 | CTAGTCACTC  | 7,728 | 3,522 |
| YP014 | CTCTACGCTC  | 8,444 | 3,304 |
| YP015 | CTGTACATAC  | 7,335 | 3,253 |
| YP016 | TAGACTGCAC  | 6,978 | 3,084 |
| YP017 | TAGCGCGCGC  | 6,364 | 2,879 |
| YP018 | TAGCTCTATC  | 7,905 | 3,615 |
| YP019 | TATAGACATC  | 6,284 | 2,626 |
| YP020 | TATGATACGC  | 8,752 | 3,642 |
| YP021 | TCACTCATAAC | 6,120 | 2,482 |
| YP022 | TCATCGAGTC  | 7,596 | 3,222 |
| YP023 | TCGAGCTCTC  | 5,745 | 2,454 |
| YP024 | TCGCAGACAC  | 5,456 | 2,045 |
| YP025 | TCTGTCTCGC  | 5,256 | 2,300 |
| YP026 | TGAGTGACGC  | 4,425 | 1,574 |
| YP027 | TGATGTGTAC  | 5,146 | 2,149 |
| YP028 | TGCTATAGAC  | 6,601 | 2,847 |
| YP029 | TGCTCGCTAC  | 6,283 | 2,410 |
| YP030 | ACGTGCAGCG  | 5,791 | 2,236 |
| YP031 | ACTCACAGAG  | 6,235 | 2,487 |
| YP032 | AGACTCAGCG  | 5,498 | 2,182 |
| YP033 | AGAGAGTGTG  | 6,433 | 2,590 |
| YP034 | AGCTATCGCG  | 7,446 | 2,837 |
| YP035 | AGTCTGACTG  | 6,898 | 3,042 |
| YP036 | AGTGAGCTCG  | 5,624 | 2,189 |
| YP037 | ATAGCTCTCG  | 6,885 | 3,219 |
| YP038 | ATCACGTGCG  | 7,238 | 3,205 |
| YP039 | ATCGTAGCAG  | 7,898 | 3,561 |
| YP040 | ATCGTCTGTG  | 7,050 | 2,909 |
| YP041 | ATGTACGATG  | 6,557 | 2,209 |
| YP042 | ATGTGTCTAG  | 5,536 | 2,237 |
| YP043 | CACACGATAG  | 8,228 | 3,476 |
| YP044 | CACTCGCACG  | 6,711 | 2,637 |
| YP045 | CAGACGTCTG  | 6,417 | 2,311 |
| YP046 | CAGTACTGCG  | 5,901 | 2,178 |



|       |            |       |       |
|-------|------------|-------|-------|
| YP047 | CGACAGCGAG | 7,204 | 3,084 |
| YP048 | CGATCTGTCG | 7,239 | 2,702 |
| YP049 | CGCGTGCTAG | 5,786 | 2,112 |
| YP050 | CGCTCGAGTG | 6,508 | 2,760 |
| YP051 | CGTGATGACG | 6,260 | 2,660 |
| YP052 | CTATGTACAG | 6,926 | 2,683 |

---

Pyrosequencing analyses of the 140 samples were performed in three runs (pool 1, HS001–022; pool 2, HS023–037; pool 3, HS038–088 and YP001–052).

Table S4. Statistics in PERMANOVA for the weighted UniFrac analysis which correspond to the results shown in Fig 1A and S3.

|                                                   | F value | Partial $\eta^2$ | P-value |
|---------------------------------------------------|---------|------------------|---------|
| Geographic difference                             |         |                  |         |
| Korean (n = 52) vs. Japanese (n = 88)             | 31.2    | 0.18             | < 0.001 |
| Age                                               |         |                  |         |
| 40–49 years (n = 42) vs. $\geq$ 50 years (n = 98) | 1.32    | 0.009            | 0.23    |
| Gender                                            |         |                  |         |
| Female (n = 60) vs. Male (n = 80)                 | 2.52    | 0.018            | 0.051   |
| Obesity (Body mass index, BMI) <sup>a</sup>       |         |                  |         |
| $\geq$ 25 (n = 41) vs. < 25 (n = 98)              | 1.65    | 0.011            | 0.14    |
| Smoking status <sup>a</sup>                       |         |                  |         |
| Never (n = 92) vs. Past and Current (n = 47)      | 9.18    | 0.062            | < 0.001 |
| Never and Past (n = 118) vs. Current (n = 21)     | 7.85    | 0.054            | < 0.001 |
| Geographic difference in non-smoker <sup>b</sup>  |         |                  |         |
| Korean (n = 45) vs. Japanese (n = 47)             | 21.4    | 0.19             | < 0.001 |

<sup>a</sup> One Korean individual had no data about smoking status and BMI.

<sup>b</sup> Geographic difference was assessed after exclusion of individuals with smoking history (n = 92).

Table S5. Comparison of peak area proportions of terminal restriction fragments (TRFs) corresponding to *Neisseria*, *Haemophilus*, *Prevotella* and *Veillonella* species in orally-healthy individuals with those in the other individuals.

| TRFs                                                                               | Peak area proportion of each TRFs |                                  |                              |                                 |                                |                              |
|------------------------------------------------------------------------------------|-----------------------------------|----------------------------------|------------------------------|---------------------------------|--------------------------------|------------------------------|
|                                                                                    | Individuals in Japan              |                                  |                              | Individuals in South Korea      |                                |                              |
|                                                                                    | Healthy individuals<br>(n = 88)   | Other individuals<br>(n = 2,184) | <i>P</i> -value <sup>a</sup> | Healthy individuals<br>(n = 52) | Other individuals<br>(n = 491) | <i>P</i> -value <sup>a</sup> |
| TRFs corresponding to <i>Neisseria</i> and <i>Haemophilus</i> species <sup>b</sup> |                                   |                                  |                              |                                 |                                |                              |
| F109                                                                               | 11.5 ± 6.0                        | 8.5 ± 6.2                        | <0.001                       | 21.3 ± 6.4                      | 18.0 ± 7.2                     | 0.001                        |
| F127                                                                               | 1.5 ± 1.2                         | 0.8 ± 1.1                        | <0.001                       | 1.8 ± 1.3                       | 0.8 ± 1.2                      | <0.001                       |
| R150                                                                               | 21.1 ± 6.9                        | 18.0 ± 6.7                       | <0.001                       | 27.4 ± 5.9                      | 23.1 ± 7.3                     | <0.001                       |
| TRFs corresponding to <i>Veillonella</i> species <sup>b</sup>                      |                                   |                                  |                              |                                 |                                |                              |
| F115                                                                               | 13.2 ± 8.3                        | 14.8 ± 8.1                       | 0.008                        | 7.1 ± 6.0                       | 9.5 ± 7.5                      | 0.001                        |
| R102                                                                               | 3.9 ± 4.0                         | 5.1 ± 3.7                        | <0.001                       | 1.9 ± 2.5                       | 3.4 ± 3.7                      | <0.001                       |
| TRFs corresponding to <i>Prevotella</i> species <sup>b</sup>                       |                                   |                                  |                              |                                 |                                |                              |
| F118                                                                               | 0.3 ± 0.9                         | 0.9 ± 1.6                        | <0.001                       | 0.2 ± 0.6                       | 0.4 ± 1.0                      | 0.17                         |
| F176                                                                               | 8.9 ± 4.5                         | 10.9 ± 4.8                       | <0.001                       | 7.8 ± 4.3                       | 9.7 ± 5.0                      | 0.01                         |
| R60                                                                                | 3.3 ± 1.6                         | 3.7 ± 2.0                        | 0.10                         | 3.6 ± 2.0                       | 3.7 ± 2.4                      | 0.87                         |
| R146                                                                               | 10.0 ± 4.3                        | 10.8 ± 4.4                       | 0.05                         | 7.7 ± 4.4                       | 9.2 ± 4.8                      | 0.02                         |

<sup>a</sup> *P*-values were calculated by Wilcoxon rank-sum test.

<sup>b</sup> Details of bacterial candidates corresponding to T-RF combinations (F, 6-FAM labeled and R, HEX labeled) were described in Table S2.
